# Supplementary material for: Heterogeneous CoS2/MS2 microspheres for an efficient oxygen evolution reaction
Source: Royal Society of Chemistry journal article supplement (doi:10.1039/d3qi01878d), 2023-11-09
Supplement: d3qi01878d1.pdf [file d3qi01878d1.pdf]

## Supporting information

### Heterogeneous CoS<sub>2</sub>/MS<sub>2</sub> Microspheres for Efficient Oxygen Evolution Reaction

Xiaoqu Wang,<sup>a, c, 1</sup> Limin Wang,<sup>a, 1</sup> Karuppasamy Kohila Rani,<sup>b</sup> Xinglan Peng,<sup>a</sup> Yu Ning,<sup>a</sup> Xiaotian Liu<sup>a</sup>, Youjun Fan,<sup>a, \*</sup> Du-Hong Chen<sup>a, \*</sup> and Wei Chen<sup>a, \*</sup>

<sup>a</sup> *Guangxi Key Laboratory of Low Carbon Energy Materials, School of Chemistry and Pharmaceutical Sciences, Guangxi Normal University, Guilin 541004, China*

<sup>b</sup> *Key Laboratory of Flexible Electronics (KLOFE) and Institute of Advanced Materials (IAM), Nanjing Tech University (NanjingTech), Nanjing 211816, China*

<sup>c</sup> *School of Materials and Energy, Institute of Energy Storage Technologies, Yunnan University, Kunming 650091, China*

\* Corresponding authors.

*E-mail addresses:* youjunfan@mailbox.gxnu.edu.cn (Y.-J. Fan), dhchen@gxnu.edu.cn (D.-H. Chen), weichen@mailbox.gxnu.edu.cn (W. Chen).

<sup>1</sup> These authors contributed equally to the work.

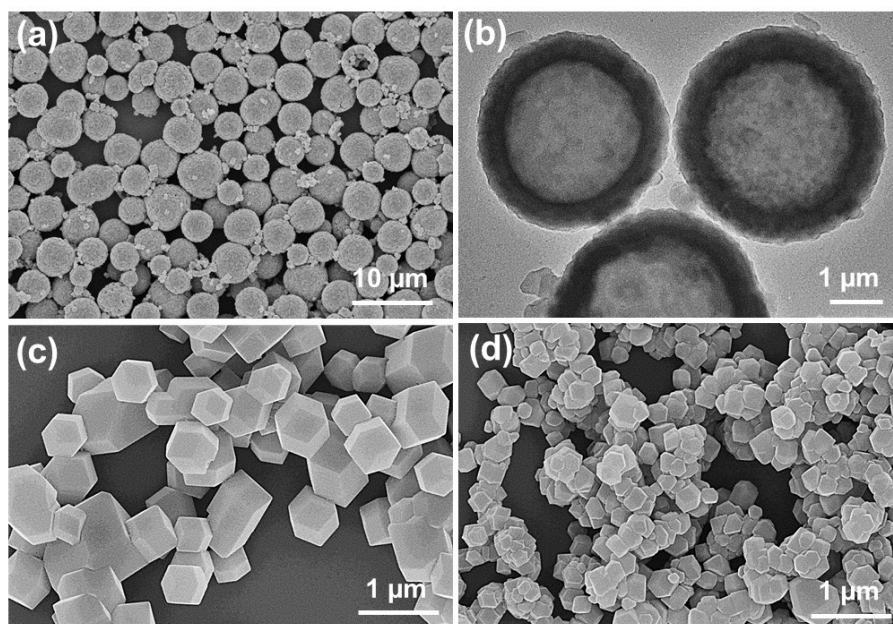

**Fig. S1** SEM images (a) and TEM images (b) of ZIF-67-HMS synthesized in DES, (c and d) SEM images of ZIF-67 polyhedrons synthesized in methanol and ethanol, respectively.

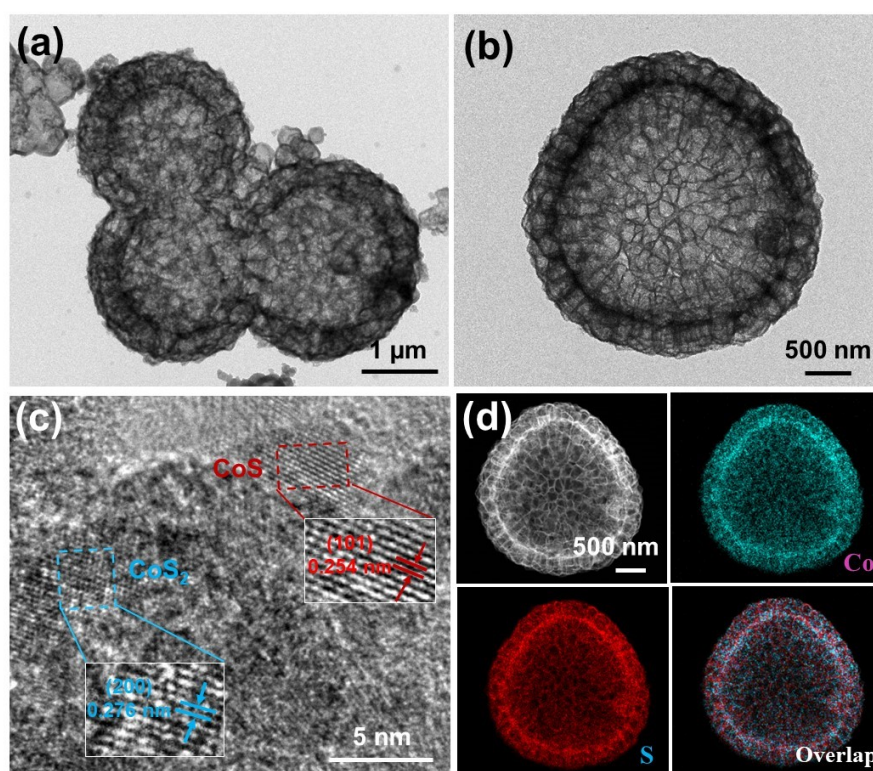

**Fig. S2** TEM images (a and b), HRTEM image (c), HAADF-STEM image and corresponding EDS mapping (d) of CoS/CoS<sub>2</sub>-HMS.

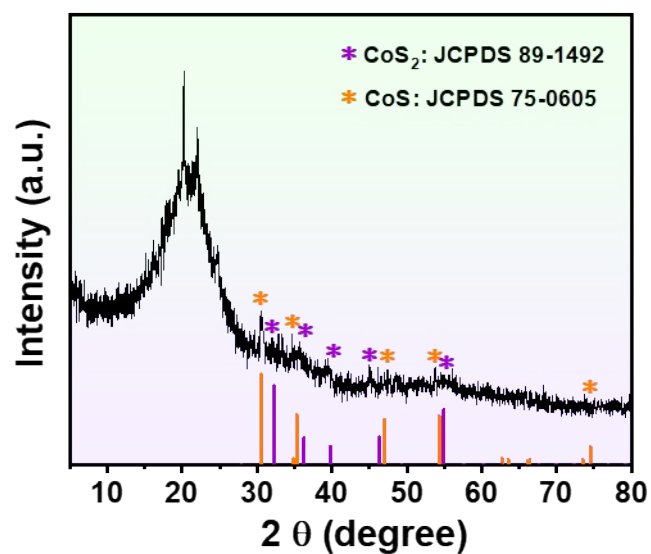

**Fig. S3** XRD pattern of CoS/CoS<sub>2</sub>-HMS.

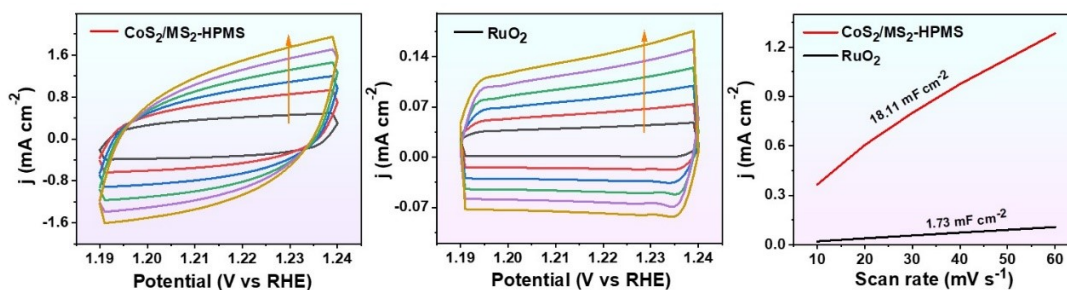

**Fig. S4** CV curves of CoS<sub>2</sub>/MS<sub>2</sub>-HPMS (a) and commercial RuO<sub>2</sub> (b) in the potential range of non-Faradaic region (1.19–1.24 V vs. RHE). (c) The linear fitted line of  $\Delta j$  vs scan rate ( $v$ ) in the corresponding CV curves.

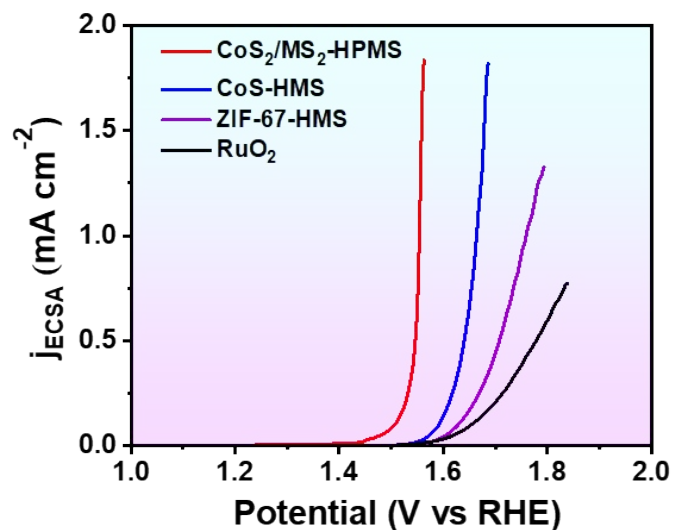

**Fig. S5** ECSA-normalized LSV curves of ZIF-67-HMS, CoS/CoS<sub>2</sub>-HMS, CoS<sub>2</sub>/MS<sub>2</sub>-HPMS, and commercial RuO<sub>2</sub>.

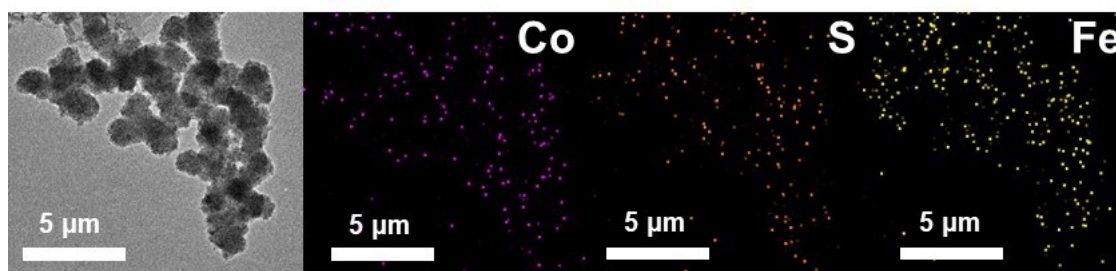

**Fig. S6** The TEM-mapping images of  $\text{CoS}_2/\text{MS}_2\text{-HPMS}$  after operating 5000 cycles of CV in 1 M KOH alkaline solution at the scan rate of  $100 \text{ mV s}^{-1}$ .



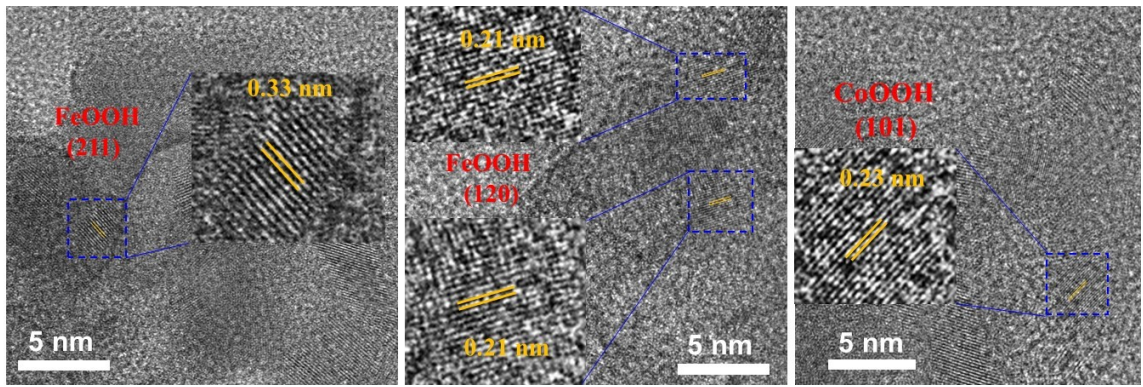

**Fig. S7** The HRTEM of  $\text{CoS}_2/\text{MS}_2\text{-HPMS}$  after operating 5000 cycles of CV in 1 M KOH alkaline solution at the scan rate of  $100 \text{ mV s}^{-1}$ .

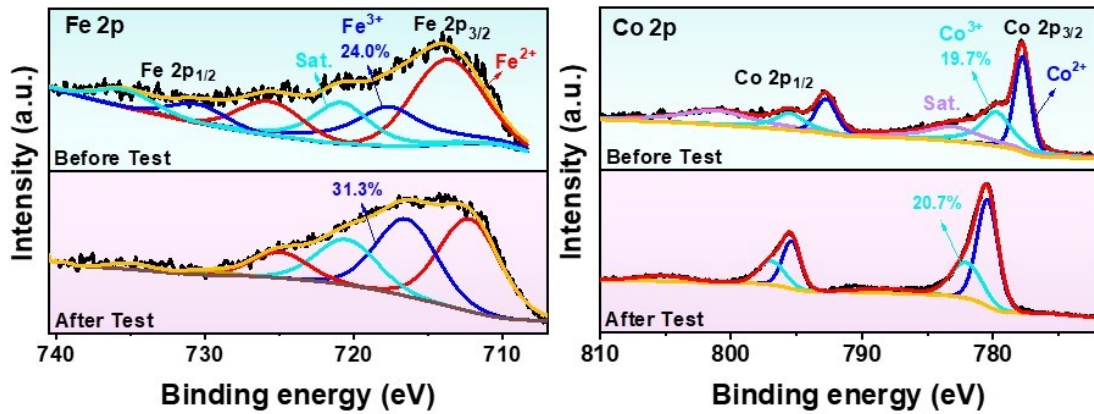

**Fig. S8** The Fe 2p and Co 2p of  $\text{CoS}_2/\text{MS}_2\text{-HPMS}$  after operating 5000 cycles of CV in 1 M KOH alkaline solution at the scan rate of  $100 \text{ mV s}^{-1}$  after

**Table S1.** Comparisons of catalytic performance of CoS<sub>2</sub>/MS<sub>2</sub>-HPMS and other bimetallic sulfide electrocatalysts reported recently for OER.

| Catalysts                                           | Electrolyte    | Overpotential at 10 mA cm <sup>-2</sup> (mV) | Tafel slope (mV dec <sup>-1</sup> ) | References       |
|-----------------------------------------------------|----------------|----------------------------------------------|-------------------------------------|------------------|
| Co <sub>3</sub> S <sub>4</sub> @MoS <sub>2</sub>    | 1 M KOH        | 330                                          | 59                                  | 1                |
| CoMoS-600                                           | 1 M KOH        | 350                                          | 64                                  | 2                |
| CC/CNTs@CoS <sub>0.74</sub> Se <sub>0.52</sub>      | 1 M KOH        | 285                                          | 63                                  | 3                |
| Co <sub>9</sub> S <sub>8</sub> /S-CNTs              | 1 M KOH        | 331                                          | 88                                  | 4                |
| CuS@CoS <sub>2</sub>                                | 1 M KOH        | 230                                          | 67                                  | 5                |
| Co <sub>3</sub> S <sub>4</sub> @MoS <sub>2</sub>    | 1 M KOH        | 280                                          | 43                                  | 6                |
| ZnCoS-NSCNT/NP                                      | 1 M KOH        | 270                                          | 73                                  | 7                |
| CeO <sub>2</sub> @CoS/MoS <sub>2</sub>              | 1 M KOH        | 247                                          | 64                                  | 8                |
| NiCoS/Ti <sub>3</sub> C <sub>2</sub> T <sub>x</sub> | 1 M KOH        | 365                                          | 58                                  | 9                |
| FeS <sub>2</sub> /CoS <sub>2</sub> NSs              | 1 M KOH        | 340                                          | 76                                  | 10               |
| <b>CoS<sub>2</sub>/MS<sub>2</sub>-HPMS</b>          | <b>1 M KOH</b> | <b>217</b>                                   | <b>65</b>                           | <b>This work</b> |

**Refere  
nces**  
1 Y.  
Guo, J.  
Tang,  
H.  
Qian, Z.  
Wang  
and Y.  
Yamau  
chi,  
One-  
Pot  
Synthe

sis of Zeolitic Imidazolate Framework 67-Derived Hollow Co<sub>3</sub>S<sub>4</sub>@MoS<sub>2</sub> Heterostructures as Efficient Bifunctional Catalysts, *Chem. Mater.*, 2017, **29**, 5566-5573.

- Z. Huang, Z. Yang, Q. Jia, N. Wang, Y. Zhu and Y. Xia, Bimetallic Co-Mo sulfide/carbon composites derived from polyoxometalate encapsulated polydopamine-decorated ZIF nanocubes for efficient hydrogen and oxygen evolution, *Nanoscale*, 2022, **14**, 4726-4739.
- Y. Zhang, Y. Qiu, X. Ji, T. Ma, Z. Ma and P.A. Hu, Direct Growth of CNTs@CoS<sub>x</sub>Se<sub>2(1-x)</sub> on Carbon Cloth for Overall Water Splitting, *ChemSusChem*, 2019, **12**, 3792-3800.
- J. Wang, H. Liu, Y. Liu, W. Wang, Q. Sun, X. Wang, X. Zhao, H. Hu and M. Wu, Sulfur bridges between Co<sub>9</sub>S<sub>8</sub> nanoparticles and carbon nanotubes enabling robust oxygen electrocatalysis, *Carbon*, 2019, **144**, 259-268.
- C. Huang, S. Cheng, L. Yu, W. Zhang, J. Zhou, Y. Zhang and Y. Yu, Electrolyzer with hierarchical transition metal sulfide and phosphide towards overall water splitting, *Mater. Today Phys.*, 2019, **11**, 100162.
- Y. Guo, J. Tang, Z. Wang, Y.-M. Kang, Y. Bando and Y. Yamauchi, Elaborately assembled core-shell structured metal sulfides as a bifunctional catalyst for highly efficient electrochemical overall water splitting, *Nano Energy*, 2018, **47**, 494-502.
- Z. Yu, Y. Bai, S. Zhang, Y. Liu, N. Zhang and K. Sun, Metal-organic framework-derived Zn<sub>0.975</sub>Co<sub>0.025</sub>S/CoS<sub>2</sub> embedded in N,S-codoped carbon nanotube/nanopolyhedra as an

- efficient electrocatalyst for overall water splitting, *J. Mater. Chem. A*, 2018, **6**, 10441-10446.
- 8 W.-H. Huang, X.-M. Li, X.-F. Yang, H.-Y. Zhang, P.-B. Liu, Y.-M. Ma and X. Lu, CeO<sub>2</sub>-embedded mesoporous CoS/MoS<sub>2</sub> as highly efficient and robust oxygen evolution electrocatalyst, *Chem. Eng. J.*, 2021, **420**, 127595.
- 9 H. Zou, B. He, P. Kuang, J. Yu and K. Fan, Metal-Organic Framework-Derived Nickel-Cobalt Sulfide on Ultrathin Mxene Nanosheets for Electrocatalytic Oxygen Evolution, *ACS Appl. Mater. Interfaces*, 2018, **10**, 22311-22319.
- 10 Y. Li, J. Yin, L. An, M. Lu, K. Sun, Y.-Q. Zhao, D. Gao, F. Cheng and P. Xi, FeS<sub>2</sub>/CoS<sub>2</sub> Interface Nanosheets as Efficient Bifunctional Electrocatalyst for Overall Water Splitting, *Small*, 2018, **14**, 1801070.
